# Supplementary material
Source: PubMed Central journal article supplement (PMC2947913)
Supplement: 1009459107_pnas.201009459SI.pdf [file 1009459107_pnas.201009459SI.pdf]

# Supporting Information

de Rooij et al. 10.1073/pnas.1009459107

**Table S1. Head circumference at the mean ages of 50 and 58 y according to prenatal exposure to the Dutch famine**

|                                        | Born before | Exposure to famine |                  |                    | Conceived after | Total      |
|----------------------------------------|-------------|--------------------|------------------|--------------------|-----------------|------------|
|                                        |             | In late gestation  | In mid gestation | In early gestation |                 |            |
| <i>N</i>                               | 148         | 87                 | 77               | 45                 | 141             | 498        |
| Female (%)                             | 49          | 51                 | 57               | 51                 | 53              | 52         |
| Head circumference at age 50 (cm)      | 56.9        | 57.0               | 56.6             | 57.0               | 57.1            | 56.9 (2.1) |
| Head circumference at age 58 (cm)      | 56.2        | 56.0               | 55.5*            | 56.0               | 56.4            | 56.1 (2.1) |
| Difference in head circumference (cm)  | -0.7        | -1.0*              | -1.1*            | -1.0               | -0.7            | -0.9 (1.0) |
| Difference in BMI (kg/m <sup>2</sup> ) | 1.2         | 0.8                | 0.8              | 0.9                | 1.3             | 1.1 (2.4)  |
| Education <sup>†</sup>                 | 4.4         | 4.8                | 4.2              | 4.4                | 4.2             | 4.4 (2.1)  |

Data are given as frequency and means (SD). BMI: body mass index. The mean difference in head circumference decrease between those exposed and those unexposed to famine during gestation was 0.3 cm (95% CI: 0.2–0.5, adjusted for sex). When we additionally adjusted for BMI difference, the educational level, the research nurse who performed the measurement, and the period during the study in which the measurement was performed, the effect decreased to 0.2 cm but was still statistically significant (95% CI: 0.1–0.3). Shaded areas indicate the groups exposed to famine during gestation compared with the control groups unexposed to famine during gestation.

\*Statistically significant difference (based on linear regression analyses,  $P < 0.05$ , adjusted for sex) compared with participants unexposed to famine during gestation.

<sup>†</sup>Educational level measured on a 10-point scale (1 = primary education not completed, 10 = university completed).

**Table S2. Overview of educational levels measured on a 10-point scale**

| Scale point | Educational levels                     |
|-------------|----------------------------------------|
| 1           | Primary education not completed        |
| 2           | Primary education completed            |
| 3           | Lower vocational training completed    |
| 4           | Mediate general education completed    |
| 5           | Mediate vocational training completed  |
| 6           | Higher general education not completed |
| 7           | Higher general education completed     |
| 8           | Higher vocational training completed   |
| 9           | University not completed               |
| 10          | University completed                   |
